# Supplementary material for: Advancing COVID-19 diagnostics: rapid detection of intact SARS-CoV-2 using viability RT-PCR assay
Source: PubMed Central journal article supplement (PMC11370235; doi:10.1128/spectrum.00160-24), 2024-07-22
Supplement: reviewer-comments.pdf [file reviewer-comments.pdf]

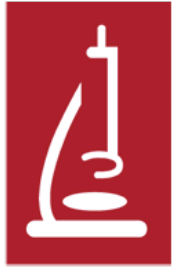

AMERICAN  
SOCIETY FOR  
MICROBIOLOGY

# Microbiology Spectrum

## Advancing COVID-19 diagnostics: Rapid detection of intact SARS-CoV-2 using viability RT-PCR assay

Judith Veugen, Tom Schoenmakers, Inge van Loo, Bart Haagmans, Mathie Leers, Mart Lamers, Mayk Lucchesi, Bas van Bussel, Walther van Mook, Rudy Nuijts, Paul Savelkoul, Mor Dickman, and Petra Wolffs

*Corresponding Author(s): Petra Wolffs, Maastricht Universitair Medisch Centrum+*

---

### Review Timeline:

|                     |                   |
|---------------------|-------------------|
| Submission Date:    | January 23, 2024  |
| Editorial Decision: | February 25, 2024 |
| Revision Received:  | June 3, 2024      |
| Accepted:           | June 10, 2024     |

---

*Editor: Anne Wyllie*

*Reviewer(s): The reviewers have opted to remain anonymous.*

### Transaction Report:

(Note: With the exception of the correction of typographical or spelling errors that could be a source of ambiguity, letters and reports are not edited. The original formatting of letters and referee reports may not be reflected in this compilation.)

**DOI:** <https://doi.org/10.1128/spectrum.00160-24>

Re: Spectrum00160-24 (Advancing COVID-19 diagnostics: Rapid detection of intact SARS-CoV-2 using viability RT-PCR assay)

Dear Dr. Petra F.G. Wolffs:

Thank you for the privilege of reviewing your work. Below you will find my comments, instructions from the Spectrum editorial office, and the reviewer comments.

Please note comments from Reviewer 1 in particular. Additional verification of the assay with the appropriate controls should be considered.

Please return the manuscript within 60 days; if you cannot complete the modification within this time period, please contact me. If you do not wish to modify the manuscript and prefer to submit it to another journal, notify me immediately so that the manuscript may be formally withdrawn from consideration by Spectrum.

### Revision Guidelines

To submit your modified manuscript, log into the submission site at <https://spectrum.msubmit.net/cgi-bin/main.plex>. Go to Author Tasks and click the appropriate manuscript title to begin. The information you entered when you first submitted the paper will be displayed; update this as necessary. Note the following requirements:

- Upload point-by-point responses to the issues raised by the reviewers in a file named "Response to Reviewers," NOT IN YOUR COVER LETTER
- Upload a compare copy of the manuscript (without figures) as a "Marked-Up Manuscript" file
- Upload a clean .DOC/.DOCX version of the revised manuscript and remove the previous version
- Each figure must be uploaded as a separate, editable, high-resolution file (TIFF or EPS preferred), and any multipanel figures must be assembled into one file
- Any [supplemental material](#) intended for posting by ASM should be uploaded separate from the main manuscript; you can combine all supplemental material into one file (preferred) or split it into a maximum of 10 files, with all associated legends included

For complete guidelines on revision requirements, see our [Submission and Review Process](#) webpage. Submission of a paper that does not conform to guidelines may delay acceptance of your manuscript.

**Data availability:** ASM policy requires that data be available to the public upon online posting of the article, so please verify all links to sequence records, if present, and make sure that each number retrieves the full record of the data. If a new accession number is not linked or a link is broken, provide Spectrum production staff with the correct URL for the record. If the accession numbers for new data are not publicly accessible before the expected online posting of the article, publication may be delayed; please contact production staff ([Spectrum@asmusa.org](mailto:Spectrum@asmusa.org)) immediately with the expected release date.

**Publication Fees:** For information on publication fees and which article types are subject to charges, visit our [website](#). If your manuscript is accepted for publication and any fees apply, you will be contacted separately about payment during the production process; please follow the instructions in that e-mail. Arrangements for payment must be made before your article is published.

**ASM Membership:** Corresponding authors may [join or renew ASM membership](#) to obtain discounts on publication fees. Need to upgrade your membership level? Please contact Customer Service at [Service@asmusa.org](mailto:Service@asmusa.org).

The ASM Journals program strives for constant improvement in our submission and publication process. Please tell us how we can improve your experience by taking this quick [Author Survey](#).

Thank you for submitting your paper to Spectrum.

Sincerely,  
Anne Wyllie  
Editor  
Microbiology Spectrum

Reviewer #1 (Comments for the Author):

To the test tubes, PMA and SDS were added and the tubes were incubated for 30 minutes at 37 degrees and subsequently subjected to photolysis, and then lysis buffer was added. The control tubes were not incubated, did not receive SDS and were not subjected to photolysis but were lysed immediately. The possible influence of the 30 minutes incubation at 37, the SDS, or

high-energy blue light, are thus not taken into account. An additional control in the form of extracted virus RNA treated with PMA and without PMA would have been appropriate to demonstrate the actual function of the PMA.

It is not clear to what extent the viral RNA becomes exposed by the heat treatment. Inactivation of the virus is not proven by plaque analysis.

Reviewer #2 (Comments for the Author):

Authors have tried a novel assays for SARS COVID . Experiment is well designed and done comprehensively, however there is a need for little more discussion on analytical sensitivity and specificity of the assay and also it's diagnostic sensitivity and specificity in comparison to the gold standard assay like Real Time PCR . This can be added as a limitation of the study also.

## Response to reviewer comments

Editor

Please note comments from Reviewer 1 in particular. Additional verification of the assay with the appropriate controls should be considered.

We thank the editor for the opportunity to revise our paper. We performed an additional verification with the appropriate controls as suggested. The details of the additional verification can be found in our response to reviewer #1, point 1 section.

Reviewer #1

1. To the test tubes, PMA and SDS were added and the tubes were incubated for 30 minutes at 37 degrees and subsequently subjected to photolysis, and then lysis buffer was added. The control tubes were not incubated, did not receive SDS and were not subjected to photolysis but were lysed immediately. The possible influence of the 30 minutes incubation at 37, the SDS, or high-energy blue light, are thus not taken into account. An additional control in the form of extracted virus RNA treated with PMA and without PMA would have been appropriate to demonstrate the actual function of the PMA.

Response: We thank the reviewer for this suggestion, and we agree that additional experiments to demonstrate the actual function of PMAxx and the potential influence of the 30 min incubation at 37°C, 0.005% SDS, and the PMA lite is valuable. In response to this suggestion, we conducted additional experiments in duplicate using extracted SARS-CoV-2 RNA. The results obtained clearly indicate that the 30 min incubation at 37°C, 0.005% SDS, and the PMA lite alone do not affect the v-PCR assay. We only observed an effect when these steps were combined with the pretreatment of samples using PMAxx (Table 1).

Table 1. Cycle threshold (Ct) values and delta Ct ( $\Delta$ Ct) values of SARS-COV-2 RNA to demonstrate the actual function of PMAxx.  $\Delta$ Ct values are calculated by subtracting the Ct value of the treated sample from the direct lysed sample. UD, undetectable: no detectable Ct value that exceeded the threshold within 42 cycles.

| Sample | Conditions   |             |            |                 | Ct value I | $\Delta$ Ct value I | Ct value II | $\Delta$ Ct value II |
|--------|--------------|-------------|------------|-----------------|------------|---------------------|-------------|----------------------|
| 1      | Direct lysis |             |            |                 | 23.6       |                     | 23.6        |                      |
| 2      |              | 30 min RT   |            |                 | 23.2       | 0.4                 | 23.6        | 0.0                  |
| 3      |              |             |            | 10 min PMA lite | 22.9       | 0.7                 | 23.1        | 0.5                  |
| 4      |              | 30 min 37°C |            |                 | 23.2       | 0.4                 | 23.2        | 0.4                  |
| 5      |              | 30 min 37°C | 0.005% SDS |                 | 23.4       | 0.2                 | 23.0        | 0.6                  |
| 6      |              | 30 min 37°C | 0.005% SDS | 10 min PMA lite | 23.1       | 0.5                 | 23.2        | 0.4                  |

|   |                      |                |               |                    |      |       |    |        |
|---|----------------------|----------------|---------------|--------------------|------|-------|----|--------|
| 7 | 100 $\mu$ M<br>PMAxx | 30 min<br>37°C | 0.005%<br>SDS | 10 min<br>PMA lite | 37.0 | -13.4 | UD | >-13.5 |
| 8 | NTC (WMB)            |                |               |                    | UD   |       | UD |        |

The following paragraphs were added to the manuscript:

“To evaluate the potential impact of the 30-minute incubation at 37°C, 0.005% SDS, and the PMA lite, experiments were performed using extracted SARS-CoV-2 RNA. The v-PCR assay was performed for each step separately to assess its individual influence.” (lines 138-140, materials and methods) and

#### “**Functionality PMAxx**

To demonstrate the functionality of PMAxx and assess the potential influence of the 30-minute incubation at 37°C, 0.005% SDS, and the PMA lite, duplicated experiments were performed using extracted SARS-CoV-2 RNA. The individual steps of 30-minute incubation at 37°C, 0.005% SDS, and the PMA lite did not affect the v-PCR assay, as evidenced by mean delta Ct values of 0.4, 0.4, and 0.5 respectively. However, an effect was observed when these steps were combined with the pretreatment using PMAxx, resulting in a mean delta Ct value of >-13.5, corresponding to a mean log reduction >4.1.” (lines 188-195, results)

2. It is not clear to what extent the viral RNA becomes exposed by the heat treatment. Inactivation of the virus is not proven by plaque analysis.

Response: We appreciate the reviewer raising this important point regarding verification of SARS-CoV-2 inactivation. As the reviewer correctly noted, we were unable to prove complete inactivation of the virus as no culturing after inactivation was performed.

During optimization of the protocol, we did attempt multiple heat inactivation protocols, including heating at 60°C for various time durations. However, we found these were insufficient as the maximum delta Ct value achieved was only -0.9. Upon heat inactivation for 5 min at 95°C, we were able to reach a maximum delta Ct value of -14.2, similar to the inactivation of naked RNA. While we assumed successful inactivation, we acknowledge we could not definitively prove this without culturing experiments and added this as a limitation to the manuscript : “While successful inactivation was assumed, definitive proof would require culturing experiments, which were not performed.” (lines 244-245, discussion)

## Reviewer #2

1. Authors have tried a novel assays for SARS COVID . Experiment is well designed and done comprehensively, however there is a need for little more discussion on analytical sensitivity and specificity of the assay and also it's diagnostic sensitivity and specificity in comparison to the gold standard assay like Real Time PCR.

Response: We acknowledge the reviewer's comment regarding the need for a more comprehensive discussion on the analytical sensitivity and specificity of the v-PCR in comparison to the gold standard assay.

The sensitivity and specificity of the v-PCR are influenced by the choice of the PCR used after pMAXX treatment. The method can be combined with any PCR, provided the fragment is long enough to achieve good pMAXX binding.

Regarding the sensitivity of the current v-PCR setup, we found it to be approximately 5 copies/PCR.

To evaluate the specificity of the v-PCR, we applied the v-PCR in a large clinical study and compared the results of the v-PCR with our current routine clinical diagnostics PCR. During this comparison, no false positive results were observed with the v-PCR

We added the following text to the discussion: “Importantly, this technique can be combined with any PCR assay while preserving the characteristics and performance of the original assay, provided the fragment is long enough for optimal pMAXX binding.” (lines 251-253, discussion)

Re: Spectrum00160-24R1 (Advancing COVID-19 diagnostics: Rapid detection of intact SARS-CoV-2 using viability RT-PCR assay)

Dear Dr. Petra F.G. Wolffs:

Thank you for your thoughtful edits in response to the reviewer's comments.

Your manuscript has been accepted, and I am forwarding it to the ASM production staff for publication. Your paper will first be checked to make sure all elements meet the technical requirements. ASM staff will contact you if anything needs to be revised before copyediting and production can begin. Otherwise, you will be notified when your proofs are ready to be viewed.

**Data Availability:** ASM policy requires that data be available to the public upon online posting of the article, so please verify all links to sequence records, if present, and make sure that each number retrieves the full record of the data. If a new accession number is not linked or a link is broken, provide production staff with the correct URL for the record. If the accession numbers for new data are not publicly accessible before the expected online posting of the article, publication may be delayed; please contact ASM production staff immediately with the expected release date.

**Publication Fees:** For information on publication fees and which article types have charges, please visit our [website](#). We have partnered with Copyright Clearance Center (CCC) to collect author charges. If fees apply to your paper, you will receive a message from no-reply@copyright.com with further instructions. For questions related to paying charges through RightsLink, please contact CCC at ASM\_Support@copyright.com or toll free at +1-877-622-5543. CCC makes every attempt to respond to all emails within 24 hours.

**ASM Membership:** Corresponding authors may [join or renew ASM membership](#) to obtain discounts on publication fees. Need to upgrade your membership level? Please contact Customer Service at [Service@asmusa.org](mailto:Service@asmusa.org).

**PubMed Central:** ASM deposits all Spectrum articles in PubMed Central and international PubMed Central-like repositories immediately after publication. Thus, your article is automatically in compliance with the NIH access mandate. If your work was supported by a funding agency that has public access requirements like those of the NIH (e.g., the Wellcome Trust), you may post your article in a similar public access site, but we ask that you specify that the release date be no earlier than the date of publication on the Spectrum website.

**Embargo Policy:** A press release may be issued as soon as the manuscript is posted on the [Spectrum Latest Articles webpage](#). The corresponding author will receive an email with the subject line "ASM Journals Author Services Notification" when the article is available online.

The ASM Journals program strives for constant improvement in our submission and publication process. Please tell us how we can improve your experience by taking this quick [Author Survey](#).

Thank you for submitting your paper to Spectrum.

Sincerely,  
Anne Wyllie  
Editor  
Microbiology Spectrum
